# Supplementary material for: Cardiomyocyte hypertrophy induced by Endonuclease G deficiency requires reactive oxygen radicals accumulation and is inhibitable by the micropeptide humanin
Source: PubMed Central journal article supplement — Redox Biol. 2018 Mar 1;16:146–56. doi: 10.1016/j.redox.2018.02.021 (PMC5952880; doi:10.1016/j.redox.2018.02.021), 2018-03-01
Supplement: mmc1.pdf [file mmc1.pdf]

## Supplementary Materials and Methods

S1 Table: antibody specifications

| ANTIGEN           | PROVIDER         | REFERENCE | DILUTION         | INCUBATION                       |
|-------------------|------------------|-----------|------------------|----------------------------------|
| ENDO G            | Abcam            | ab76122   | 1:1.000          | O.N. 4°C                         |
| pSer473-AKT       | Cell Signaling   | 4060      | 1:1.000          | O.N. 4°C                         |
| AKT               | Santa Cruz Techn | Sc-1618   | 1:1.000          | O.N. 4°C                         |
| pSer21/9-GSK3B    | Cell Signaling   | 9331      | 1:1.000          | O.N. 4°C                         |
| GSK3B             | Abcam            | ab18893   | 1:1.000          | O.N. 4°C                         |
| HDAC4             | Santa Cruz Techn | SC-11418  | 1:500            | O.N. 4°C                         |
| GAPDH             | Abcam            | ab8245    | 1:10.000         | 1h RT                            |
| LAMIN A/C         | Abcam            | ab8984    | 1:1.000          | O.N. 4°C                         |
| MEF2A             | Cell Signaling   | 9736      | 1:2.000          | O.N. 4°C                         |
| $\alpha$ -actinin | Sigma            | A7811     | 1:500<br>1:20000 | 1h RT (IF)<br>Overnight 4°C (WB) |

S2 Table: primers and probes used for assessing mtDNA copy number

| PRIMERS | Sequence 5' - 3'                   |
|---------|------------------------------------|
| 16S Fw  | 5' AATGGTTCG TTT GTT CAA CGA TT 3' |
| 16S Rv  | 5' AGA AAC CGA CCT GGA TTG CTC 3'  |
| ND4 Fw  | 5' TGCATCAATCATAATCCAAACTCCATGA 3' |
| ND4 Rv  | 5' GGCAGAATAGGAGTGATGATGTGA 3'     |

  

| PROBES |                                            |
|--------|--------------------------------------------|
| 16S    | FAM-5' AAG TCC TAC GTG ATC TGA GTT 3'-MGB  |
| ND4    | FAM-5' CCGACATCATTACCGGGTTTTCTCTTG 3'- MGB |
| ANG1   | Life Technologies: Mm00833184_s1           |

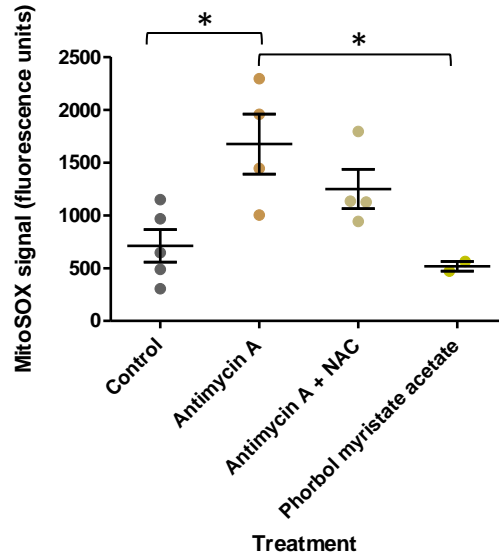

Suppl. Fig .S1. **MitoSOX signal in cardiomyocytes after induction of superoxide ( $O_2^{\cdot-}$ ) production.** Rat neonatal cardiomyocytes were cultured as described in the article and treated during 30 minutes with 50  $\mu$ M Antimycin A (antibiotic interrupting the electron flux through the electron transport chain and inducing  $O_2^{\cdot-}$  within the mitochondria), in the presence or absence of 200 $\mu$ M N-Acetyl-L-Cysteine (NAC, precursor of GSH, which is involved in the transformation of  $H_2O_2$  in water), or with 0.1  $\mu$ M Phorbol myristate acetate (an agonist of PKC, which in turn activates NADPH oxydase generating  $O_2^{\cdot-}$  in the cytosol). Then, cells were processed as described in the article to detect ROS production with the MitoSOX fluorescent indicator. Values represent fluorescence signal. Lines indicate means  $\pm$  standard errors. N=5. One way analysis of variance (ANOVA) indicated that mean differences were statistically significant ( $P < 0.05$ ). *Post hoc* Bonferroni's test was used to perform multiple comparisons. \*,  $P < 0.05$ .

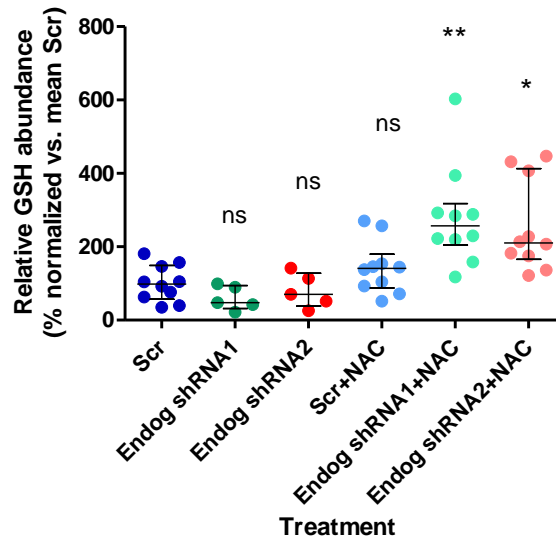

Suppl. Fig .S2. **Effects of *Endog* silencing and NAC addition on reduced thiol abundance (mostly GSH) in the Rat-1 rat fibroblast cell line.** Rat-1 fibroblast cells were transduced with a scrambled (Scr) or two different *Endog* shRNA constructs used in the article to silence the expression of *Endog*. N-Acetyl-L-Cysteine (NAC) was added (200 $\mu$ M) to some of the plates. Forty-eight hours later, the plates were processed following the manufacturer instructions to detect intracellular reduced thiol (mostly GSH) using the ThiolTracker™ violet fluorescent indicator (Molecular Probes) (Ex/Em= 404/526nm). The ThiolTracker™ signal was divided by the total protein concentration in the plate (mg). The graphic shows individual values normalized to the Scr mean in %. Non-parametric Kruskal-Wallis test was used to identify differences between groups and were found to be statistically significant ( $P < 0.001$ ). *Post hoc* Dunnett's test was carried to compare each group to Scr. Ns: not significant, \*,  $P < 0.05$ ; \*\*,  $P < 0.001$ . Lines are medians  $\pm$  interquartile ranges.

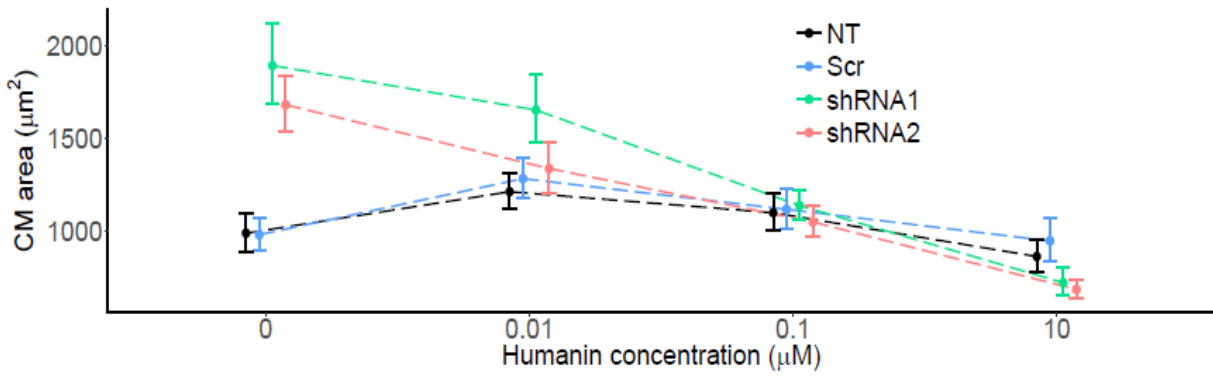

Suppl. Fig .S3. **Interaction assessment of *Endog* expression and humanin concentration in the hypertrophy of rat neonatal cardiomyocytes.** Cross sectional areas of CM from the experiment shown in Fig.5B were analyzed using linear regression models. Fitted cross sectional areas of CM and 95% confidence interval.  $P < 0.001$  for the interaction.
